# Supplementary material for: A volumetric and intra-diffusion study of solutions of AlCl3 in two ionic liquids – [C2TMEDA][Tf2N] and [C4mpyr][Tf2N]
Source: Royal Society of Chemistry journal article supplement (doi:10.1039/d2cp03304f), 2022-01-01
Supplement: d2cp03304f1.pdf [file d2cp03304f1.pdf]

## Supporting Information for

# A Volumetric and Diffusion Study of Solutions of $\text{AlCl}_3$ in Two Ionic Liquids - $[\text{C}_2\text{TMEDA}][\text{Tf}_2\text{N}]$ and $[\text{C}_4\text{mpyr}][\text{Tf}_2\text{N}]$

Kenneth R. Harris,<sup>a\*</sup> Noriko Kanai,<sup>b,c</sup> William S. Price,<sup>b</sup>

Allan M. Torres,<sup>b</sup> Scott A. Willis,<sup>d</sup> Theo Rodopoulos,<sup>e</sup> Jean-Pierre Veder<sup>e</sup> and Thomas R  ther<sup>f</sup>

<sup>a</sup> School of Science, The University of New South Wales, PO Box 7916, Canberra BC, ACT 2610, Australia. E-mail: [k.harris@adfa.edu.au](mailto:k.harris@adfa.edu.au)

<sup>b</sup> Nanoscale Organisation and Dynamics Group, School of Science, Western Sydney University, Locked Bag 1797, Penrith, NSW 2751, Australia.

<sup>c</sup> Graduate School of Engineering Science, Yokohama National University, Yokohama, Kanagawa 240- 8501, Japan.

<sup>d</sup> Nanoscale Organisation and Dynamics Group/Research Infrastructure, Research Services, Office of the Deputy Vice-Chancellor (Research, Enterprise and International), Western Sydney University, Penrith, NSW 2751, Australia

<sup>e</sup> CSIRO Mineral Resources Business Unit, Clayton, VIC 3169, Australia

<sup>f</sup> CSIRO Energy, Clayton, VIC 3169, Australia. . E-mail: [thomas.ruether@csiro.au](mailto:thomas.ruether@csiro.au)

\* Corresponding Author E-mail: [k.harris@adfa.edu.au](mailto:k.harris@adfa.edu.au)

*Phys. Chem. Chem. Phys.* 2022, **24**, 0000-0000.

**Table S1.** Densities ( $\rho/\text{g}\cdot\text{cm}^{-3}$ ), Apparent Molar Volumes of  $\text{AlCl}_3$  ( $V_{\phi,1}/\text{cm}^3\cdot\text{mol}^{-1}$ ) and Partial Molar Volumes ( $V_i/\text{cm}^3\cdot\text{mol}^{-1}$ ) of  $\text{AlCl}_3$  (1) and  $[\text{C}_2\text{TMEDA}][\text{Tf}_2\text{N}]$  (0) in their Mixtures as a Function of Temperature,  $T$ , Mole Fraction  $x$  and Molality  $m$ .

|                      |                                     | $T / \text{K}$                                                                                                               |          |          |          |          |          |          |          |          |
|----------------------|-------------------------------------|------------------------------------------------------------------------------------------------------------------------------|----------|----------|----------|----------|----------|----------|----------|----------|
| $x_1(\text{AlCl}_3)$ | $m_1/\text{mol}\cdot\text{kg}^{-1}$ | 293.15                                                                                                                       | 298.15   | 303.15   | 313.15   | 323.15   | 333.15   | 343.15   | 353.15   | 363.15   |
|                      |                                     | $\rho/\text{g}\cdot\text{cm}^{-3}$                                                                                           |          |          |          |          |          |          |          |          |
| 0 <sup>a</sup>       | 0                                   | 1.377 76                                                                                                                     | 1.373 35 | 1.368 94 | 1.360 14 | 1.351 40 | 1.342 69 | 1.334 05 | 1.325 41 | 1.316 89 |
| 0.0786               | 0.2005                              | 1.390 69                                                                                                                     | 1.386 22 | 1.381 82 | 1.373 04 | 1.364 31 | 1.355 63 | 1.346 99 | 1.338 41 | 1.329 88 |
| 0.1764               | 0.5034                              | 1.408 82                                                                                                                     | 1.404 25 | 1.399 70 | 1.390 84 | 1.382 13 | 1.373 47 | 1.364 84 | 1.356 25 | 1.347 69 |
| 0.2295               | 0.7027                              | 1.421 08                                                                                                                     | 1.416 55 | 1.412 01 | 1.402 94 | 1.394 28 | 1.385 65 | 1.377 05 | 1.368 46 | 1.359 87 |
| 0.2993               | 1.0038                              | 1.436 64                                                                                                                     | 1.432 10 | 1.427 60 | 1.418 63 | 1.409 66 | 1.401 03 | 1.392 44 | 1.383 78 | 1.375 07 |
|                      |                                     | $c / \text{mol}\cdot\text{L}^{-1}$                                                                                           |          |          |          |          |          |          |          |          |
| 0.0786               | 0.2005                              | 0.2716                                                                                                                       | 0.2708   | 0.2699   | 0.2682   | 0.2665   | 0.2648   | 0.2631   | 0.2614   | 0.2597   |
| 0.1764               | 0.5034                              | 0.6646                                                                                                                       | 0.6624   | 0.6603   | 0.6561   | 0.6520   | 0.6479   | 0.6438   | 0.6398   | 0.6357   |
| 0.2295               | 0.7027                              | 0.9130                                                                                                                       | 0.9101   | 0.9072   | 0.9014   | 0.8958   | 0.8903   | 0.8848   | 0.8792   | 0.8737   |
| 0.2993               | 1.0038                              | 1.2719                                                                                                                       | 1.2679   | 1.2639   | 1.2560   | 1.2480   | 1.2404   | 1.2328   | 1.2251   | 1.2174   |
|                      |                                     | $V_{\phi}/\text{cm}^3\cdot\text{mol}^{-1}$ (raw values, eq 2 )                                                               |          |          |          |          |          |          |          |          |
| 0                    | 0                                   | 61.67                                                                                                                        | 61.97    | 62.30    | 62.66    | 62.50    | 62.61    | 62.75    | 62.77    | 62.88    |
| 0.0786               | 0.2005                              | 62.24                                                                                                                        | 62.48    | 62.54    | 62.68    | 62.81    | 62.93    | 63.07    | 63.10    | 63.29    |
| 0.1764               | 0.5034                              | 62.86                                                                                                                        | 63.12    | 63.38    | 63.63    | 63.79    | 63.93    | 64.10    | 64.23    | 64.46    |
| 0.2295               | 0.7027                              | 62.35                                                                                                                        | 62.53    | 62.72    | 63.12    | 63.24    | 63.37    | 63.51    | 63.66    | 63.90    |
| 0.2993               | 1.0038                              | 63.18                                                                                                                        | 63.35    | 63.50    | 63.79    | 64.12    | 64.28    | 64.44    | 64.65    | 64.96    |
|                      |                                     | $V_{\phi}/\text{cm}^3\cdot\text{mol}^{-1}$ (smoothed values, from a binomial fit of density as a function of molarity, $c$ ) |          |          |          |          |          |          |          |          |
| 0                    | 0                                   | 61.7                                                                                                                         | 62.0     | 62.3     | 62.7     | 62.5     | 62.6     | 62.8     | 62.8     | 62.9     |
| 0.0786               | 0.2005                              | 62.0                                                                                                                         | 62.2     | 62.5     | 62.9     | 62.8     | 62.9     | 63.1     | 63.1     | 63.3     |

|                                             |        |                                                         |       |       |       |       |       |       |       |       |
|---------------------------------------------|--------|---------------------------------------------------------|-------|-------|-------|-------|-------|-------|-------|-------|
| 0.1764                                      | 0.5034 | 62.4                                                    | 62.6  | 62.9  | 63.2  | 63.3  | 63.4  | 63.6  | 63.7  | 63.9  |
| 0.2295                                      | 0.7027 | 62.7                                                    | 62.9  | 63.1  | 63.4  | 63.6  | 63.7  | 63.9  | 64.0  | 64.3  |
| 0.2993                                      | 1.0038 | 63.1                                                    | 63.2  | 63.4  | 63.7  | 64.0  | 64.2  | 64.3  | 64.6  | 64.9  |
| $u(V_\phi)/\text{cm}^3\cdot\text{mol}^{-1}$ |        | 1.2                                                     |       |       |       |       |       |       |       |       |
|                                             |        | $V_1/\text{cm}^3\cdot\text{mol}^{-1}$ (smoothed values) |       |       |       |       |       |       |       |       |
| 0                                           | 0      | 61.7                                                    | 62.0  | 62.3  | 62.7  | 62.5  | 62.6  | 62.8  | 62.8  | 62.9  |
| 0.0786                                      | 0.2005 | 62.3                                                    | 62.5  | 62.8  | 63.1  | 63.1  | 63.3  | 63.4  | 63.5  | 63.7  |
| 0.1764                                      | 0.5034 | 63.1                                                    | 63.3  | 63.4  | 63.8  | 64.1  | 64.2  | 64.4  | 64.6  | 64.9  |
| 0.2295                                      | 0.7027 | 63.6                                                    | 63.7  | 63.8  | 64.2  | 64.6  | 64.8  | 65.0  | 65.3  | 65.6  |
| 0.2993                                      | 1.0038 | 64.3                                                    | 64.4  | 64.4  | 64.7  | 65.4  | 65.6  | 65.8  | 66.2  | 66.7  |
| $u(V_1)/\text{cm}^3\cdot\text{mol}^{-1}$    |        | 1.2                                                     |       |       |       |       |       |       |       |       |
|                                             |        | $V_0/\text{cm}^3\cdot\text{mol}^{-1}$ (smoothed values) |       |       |       |       |       |       |       |       |
| 0                                           | 0      | 308.8                                                   | 309.8 | 310.8 | 312.8 | 314.8 | 316.8 | 318.9 | 321.0 | 323.0 |
| 0.0786                                      | 0.2005 | 308.7                                                   | 309.7 | 310.7 | 312.8 | 314.8 | 316.8 | 318.9 | 320.9 | 323.0 |
| 0.1764                                      | 0.5034 | 308.6                                                   | 309.6 | 310.6 | 312.7 | 314.6 | 316.7 | 318.7 | 320.8 | 322.8 |
| 0.2295                                      | 0.7027 | 308.5                                                   | 309.5 | 310.5 | 312.6 | 314.5 | 316.5 | 318.6 | 320.6 | 322.6 |
| 0.2993                                      | 1.0038 | 308.2                                                   | 309.3 | 310.3 | 312.4 | 314.2 | 316.2 | 318.3 | 320.3 | 322.3 |
| $u(V_0)/\text{cm}^3\cdot\text{mol}^{-1}$    |        | 1.2                                                     |       |       |       |       |       |       |       |       |

**Table S2.** Densities ( $\rho/\text{g}\cdot\text{cm}^{-3}$ ), Apparent Molar Volumes of  $\text{AlCl}_3$  ( $V_{\phi,1}/\text{cm}^3\cdot\text{mol}^{-1}$ ) and Partial Molar Volumes ( $V_i/\text{cm}^3\cdot\text{mol}^{-1}$ ) of  $\text{AlCl}_3$  (1) and  $[\text{C}_4\text{mpyr}][\text{Tf}_2\text{N}]$  (0) in their Mixtures as a Function of Temperature,  $T$ , Mole Fraction  $x$  and Molality  $m$ .

|                                               |                                     | $T/\text{K}$                                                                       |         |         |         |         |         |         |         |         |
|-----------------------------------------------|-------------------------------------|------------------------------------------------------------------------------------|---------|---------|---------|---------|---------|---------|---------|---------|
| $x_1(\text{AlCl}_3)$                          | $m_1/\text{mol}\cdot\text{kg}^{-1}$ | 293.15                                                                             | 298.15  | 303.15  | 313.15  | 323.15  | 333.15  | 343.15  | 353.15  | 363.15  |
|                                               |                                     | $\rho/\text{g}\cdot\text{cm}^{-3}$                                                 |         |         |         |         |         |         |         |         |
| 0                                             | 0                                   | 1.398 94                                                                           | 1.39451 | 1.39009 | 1.38129 | 1.37256 | 1.36388 | 1.35525 | 1.34669 | 1.33818 |
| 0.0777                                        | 0.1995                              | 1.404 49                                                                           | 1.40006 | 1.39564 | 1.38681 | 1.37799 | 1.36920 | 1.36060 | 1.35180 | 1.34301 |
| 0.1745                                        | 0.5003                              | 1.414 14                                                                           | 1.40950 | 1.40488 | 1.39572 | 1.38662 | 1.37758 | 1.36887 | 1.35979 | 1.35072 |
| 0.2281                                        | 0.6997                              | 1.420 14                                                                           | 1.41554 | 1.41094 | 1.40175 | 1.39256 | 1.38337 | 1.37437 | 1.36522 | 1.35593 |
| 0.2970                                        | 1.0001                              | 1.430 00                                                                           | 1.42523 | 1.42052 | 1.41108 | 1.40163 | 1.39219 | 1.38282 | 1.37343 | 1.36396 |
|                                               |                                     | $c/\text{mol}\cdot\text{L}^{-1}$                                                   |         |         |         |         |         |         |         |         |
| 0.0777                                        | 0.1995                              | 0.2730                                                                             | 0.2721  | 0.2713  | 0.2695  | 0.2678  | 0.2661  | 0.2644  | 0.2627  | 0.2610  |
| 0.1745                                        | 0.5003                              | 0.6632                                                                             | 0.6610  | 0.6589  | 0.6546  | 0.6503  | 0.6461  | 0.6420  | 0.6377  | 0.6335  |
| 0.2281                                        | 0.6997                              | 0.9089                                                                             | 0.9059  | 0.9030  | 0.8971  | 0.8912  | 0.8853  | 0.8796  | 0.8737  | 0.8678  |
| 0.2970                                        | 1.0001                              | 1.2618                                                                             | 1.2576  | 1.2535  | 1.2451  | 1.2368  | 1.2285  | 1.2202  | 1.2119  | 1.2036  |
|                                               |                                     | $V_{\phi}/\text{cm}^3\cdot\text{mol}^{-1}$ (raw values, eq 2 ; $V_{\phi}^0$ eq. 7) |         |         |         |         |         |         |         |         |
| 0                                             | 0                                   | 80.96                                                                              | 81.18   | 81.43   | 81.99   | 82.74   | 83.42   | 84.30   | 85.30   | 86.41   |
| 0.0777                                        | 0.1995                              | 80.26                                                                              | 80.51   | 80.78   | 81.39   | 82.18   | 82.87   | 83.75   | 84.73   | 85.81   |
| 0.1745                                        | 0.5003                              | 79.25                                                                              | 79.54   | 79.85   | 80.53   | 81.38   | 82.07   | 82.96   | 83.91   | 84.95   |
| 0.2281                                        | 0.6997                              | 78.61                                                                              | 78.93   | 79.27   | 79.98   | 80.87   | 81.58   | 82.46   | 83.40   | 84.41   |
| 0.2970                                        | 1.0001                              | 77.70                                                                              | 78.06   | 78.43   | 79.21   | 80.15   | 80.86   | 81.74   | 82.67   | 83.63   |
| $u(V_{\phi})/\text{cm}^3\cdot\text{mol}^{-1}$ |                                     | 1.2 (20 °C) to 0.2 (90 °C) $\text{cm}^3\cdot\text{mol}^{-1}$                       |         |         |         |         |         |         |         |         |
|                                               |                                     |                                                                                    |         |         |         |         |         |         |         |         |
|                                               |                                     |                                                                                    |         |         |         |         |         |         |         |         |

|                                          |        | $V_1/\text{cm}^3\cdot\text{mol}^{-1}$ (smoothed values, from a binomial fit of density as a function of molarity, $c$ ) |        |        |        |        |        |        |        |        |
|------------------------------------------|--------|-------------------------------------------------------------------------------------------------------------------------|--------|--------|--------|--------|--------|--------|--------|--------|
| 0                                        | 0      | 80.96                                                                                                                   | 81.18  | 81.43  | 81.99  | 82.74  | 83.42  | 84.30  | 85.30  | 86.41  |
| 0.0777                                   | 0.1995 | 80.44                                                                                                                   | 80.56  | 80.71  | 81.11  | 81.65  | 82.38  | 83.37  | 84.36  | 85.53  |
| 0.1745                                   | 0.5003 | 77.62                                                                                                                   | 77.96  | 78.29  | 79.02  | 79.79  | 80.68  | 81.88  | 82.77  | 83.71  |
| 0.2281                                   | 0.6997 | 76.54                                                                                                                   | 76.92  | 77.27  | 78.04  | 78.82  | 79.73  | 81.01  | 81.81  | 82.64  |
| 0.2970                                   | 1.0001 | 74.76                                                                                                                   | 75.20  | 75.59  | 76.44  | 77.27  | 78.25  | 79.71  | 80.47  | 81.22  |
| $u(V_1)/\text{cm}^3\cdot\text{mol}^{-1}$ |        | 1.2 (20 °C) to 0.2 (90 °C)                                                                                              |        |        |        |        |        |        |        |        |
|                                          |        | $V_0/\text{cm}^3\cdot\text{mol}^{-1}$                                                                                   |        |        |        |        |        |        |        |        |
| 0                                        | 0      | 301.94                                                                                                                  | 302.90 | 303.86 | 305.79 | 307.74 | 309.70 | 311.67 | 313.65 | 315.64 |
| 0.0777                                   | 0.1995 | 301.98                                                                                                                  | 302.94 | 303.90 | 305.83 | 307.78 | 309.73 | 311.70 | 313.68 | 315.68 |
| 0.1745                                   | 0.5003 | 302.18                                                                                                                  | 303.14 | 304.10 | 306.03 | 307.97 | 309.92 | 311.84 | 313.84 | 315.85 |
| 0.2281                                   | 0.6997 | 302.42                                                                                                                  | 303.37 | 304.33 | 306.25 | 308.19 | 310.13 | 312.01 | 314.02 | 316.06 |
| 0.2970                                   | 1.0001 | 302.92                                                                                                                  | 303.86 | 304.81 | 306.72 | 308.66 | 310.58 | 312.36 | 314.41 | 316.49 |
| $u(V_0)/\text{cm}^3\cdot\text{mol}^{-1}$ |        | 0.3                                                                                                                     |        |        |        |        |        |        |        |        |

**Table S3a.** Coefficients for the Fit to Eq (4) for AlCl<sub>3</sub> Solutions, Molality,  $m$ , together with Mean Expansivities  $\alpha$  [ $= -(\partial\rho/\partial T)_p/\rho$ ].<sup>a</sup>

| Solvent                                                     | [C <sub>2</sub> TMEDA][Tf <sub>2</sub> N], 293.15-363.15 K |                      |                      |                      |                      | [C <sub>4</sub> mpyr][Tf <sub>2</sub> N], 293.15-363.15 K |                      |                      |                      |                      |
|-------------------------------------------------------------|------------------------------------------------------------|----------------------|----------------------|----------------------|----------------------|-----------------------------------------------------------|----------------------|----------------------|----------------------|----------------------|
| $m$ / mol·kg <sup>-1</sup>                                  | 0.0 <sup>b</sup>                                           | 0.2005               | 0.5034               | 0.7027               | 1.0038               | 0.0 <sup>c</sup>                                          | 0.1995               | 0.5003               | 0.6997               | 1.0001               |
| $a_0$ / g·cm <sup>-3</sup>                                  | 1.657 48<br>± 0.0012                                       | 1.672 79<br>± 0.0012 | 1.705 22<br>± 0.0058 | 1.725 16<br>± 0.0082 | 1.736 54<br>± 0.0073 | 1.680 73<br>± 0.0006                                      | 1.672 88<br>± 0.0043 | 1.704 24<br>± 0.0091 | 1.692 71<br>± 0.0052 | 1.711 38<br>± 0.0022 |
| 10 <sup>3</sup> $a_1$ / g·cm <sup>-3</sup> ·K <sup>-1</sup> | -1.0221<br>± 0.0076                                        | - 1.0383<br>± 0.0073 | - 1.1245<br>± 0.036  | - 1.1708<br>± 0.050  | - 1.1404<br>± 0.045  | - 1.0365<br>± 0.0037                                      | - 0.9465<br>± 0.026  | - 1.0593<br>± 0.056  | - 0.9410<br>± 0.032  | - 0.9739<br>± 0.013  |
| 10 <sup>6</sup> $a_2$ / g·cm <sup>-3</sup> ·K <sup>-2</sup> | 0.2319<br>± 0.012                                          | 0.2589<br>± 0.011    | 0.3859<br>± 0.054    | 0.4548<br>± 0.077    | 0.4002<br>± 0.068    | 0.2565<br>± 0.0057                                        | 0.1052<br>± 0.040    | 0.2372<br>± 0.085    | 0.0380<br>± 0.049    | 0.0475<br>± 0.020    |
| 10 <sup>6</sup> $\sigma$ / g·cm <sup>-3</sup> <sup>d</sup>  | 15                                                         | 15                   | 72                   | 100                  | 91                   | 8                                                         | 54                   | 110                  | 65                   | 27                   |
| 10 <sup>3</sup> $\alpha$ / K <sup>-1</sup> <sup>e</sup>     | 0.647 ±<br>0.001                                           | 0.638 ±<br>0.004     | 0.617 ±<br>0.004     | 0.629 ±<br>0.006     | 0.625 ±<br>0.004     | 0.634 ±<br>0.001                                          | 0.638 ±<br>0.006     | 0.654 ±<br>0.002     | 0.658 ±<br>0.009     | 0.673 ±<br>0.008     |

<sup>a</sup> More than the minimum number of significant figures are retained in the fitted coefficients in this and subsequent Tables to minimize the accumulation of errors in calculations employing these coefficients. <sup>b</sup> Data from ref. 1. <sup>c</sup> Data from ref. 2. <sup>d</sup>  $\sigma$  is the standard deviation of the fit, ( $k=1$ ). <sup>e</sup> average deviations for the temperature range are included.

**Table S3b.** Coefficients for the Fit to Eq (5) for AlCl<sub>3</sub> Solutions.

| [C <sub>2</sub> TMEDA][Tf <sub>2</sub> N], 0 –1.0 mol·kg <sup>-1</sup>                       |                        |                        |                        |                        |                        |                        |                        |                        |                        |
|----------------------------------------------------------------------------------------------|------------------------|------------------------|------------------------|------------------------|------------------------|------------------------|------------------------|------------------------|------------------------|
| <i>T</i> / K                                                                                 | 293.15                 | 298.15                 | 303.15                 | 313.15                 | 323.15                 | 333.15                 | 343.15                 | 353.15                 | 363.15                 |
| <i>b</i> <sub>0</sub> / g·cm <sup>-3</sup>                                                   | 1.377 70<br>± 0.000 39 | 1.373 29<br>± 0.000 41 | 1.368 91<br>± 0.000 42 | 1.36 015<br>± 0.000 35 | 1.351 38<br>± 0.000 40 | 1.342 67<br>± 0.000 41 | 1.334 03<br>± 0.000 41 | 1.325 39<br>± 0.000 42 | 1.316 87<br>± 0.000 43 |
| 10 <sup>-3</sup> <i>b</i> <sub>1</sub> / g <sup>2</sup> ·cm <sup>-3</sup> ·mol <sup>-1</sup> | 0.066 31<br>± 0.0019   | 0.065 90<br>± 0.0020   | 0.065 48<br>± 0.0020   | 0.065 10<br>± 0.0017   | 0.065 66<br>± 0.0019   | 0.065 81<br>± 0.0020   | 0.065 84<br>± 0.0020   | 0.066 09<br>± 0.0020   | 0.066 15<br>± 0.0021   |
| 10 <sup>-6</sup> <i>b</i> <sub>2</sub> / g <sup>3</sup> ·cm <sup>-3</sup> ·mol <sup>-2</sup> | - 0.00744<br>± 0.0018  | - 0.007 16<br>± 0.0019 | - 0.006 86<br>± 0.0020 | - 0.006 73<br>± 0.0016 | - 0.007 46<br>± 0.0019 | - 0.007 53<br>± 0.0019 | - 0.007 49<br>± 0.0019 | - 0.007 77<br>± 0.0020 | -0.008 01<br>± 0.0020  |
| 10 <sup>6</sup> <i>σ</i> / g·cm <sup>-3 c</sup>                                              | 430                    | 460                    | 470                    | 380                    | 440                    | 450                    | 460                    | 470                    | 470                    |
| [C <sub>4</sub> mpyr][Tf <sub>2</sub> N], 0 –1.0 mol·kg <sup>-1</sup>                        |                        |                        |                        |                        |                        |                        |                        |                        |                        |
| <i>T</i> / K                                                                                 | 293.15                 | 298.15                 | 303.15                 | 313.15                 | 323.15                 | 333.15                 | 343.15                 | 353.15                 | 363.15                 |
| <i>b</i> <sub>0</sub> / g·cm <sup>-3</sup>                                                   | 1.398 83<br>± 0.000 23 | 1.394 42<br>± 0.000 17 | 1.390 02<br>± 0.000 12 | 1.381 25<br>± 0.000 06 | 1.372 53<br>± 0.000 05 | 1.363 86<br>± 0.000 04 | 1.355 24<br>± 0.000 02 | 1.346 67<br>± 0.000 04 | 1.338 15<br>± 0.000 04 |
| 10 <sup>-3</sup> <i>b</i> <sub>1</sub> / g <sup>2</sup> ·cm <sup>-3</sup> ·mol <sup>-1</sup> | 0.029 14<br>± 0.001 1  | 0.028 86<br>± 0.000 82 | 0.028 51<br>± 0.000 59 | 0.027 89<br>± 0.000 31 | 0.027 25<br>± 0.000 24 | 0.026 58<br>± 0.000 22 | 0.026 82<br>± 0.000 11 | 0.025 71<br>± 0.000 19 | 0.024 35<br>± 0.000 22 |
| 10 <sup>-6</sup> <i>b</i> <sub>2</sub> / g <sup>3</sup> ·cm <sup>-3</sup> ·mol <sup>-2</sup> | 0.002 02<br>± 0.001 1  | 0.001 96<br>± 0.000 79 | 0.002 00<br>± 0.000 57 | 0.001 95<br>± 0.000 30 | 0.001 87<br>± 0.000 23 | 0.001 77<br>± 0.000 21 | 0.000 76<br>± 0.000 11 | 0.001 06<br>± 0.000 19 | 0.001 48<br>± 0.000 21 |
| 10 <sup>6</sup> <i>σ</i> / g·cm <sup>-3 c</sup>                                              | 250                    | 190                    | 130                    | 71                     | 54                     | 49                     | 26                     | 44                     | 49                     |

**Table S3c.** Coefficients for the Fit to Eq (6) for AlCl<sub>3</sub> Solutions.

<sup>a</sup> A linear fit yields a composition independent  $V_\phi$ , but as the values are somewhat higher than those calculated directly from eq 4 the binomial fit has been preferred.

| [C <sub>2</sub> TMEDA][Tf <sub>2</sub> N], 0–1.27 mol·L <sup>-1</sup>      |                        |                        |                        |                        |                        |                        |                        |                        |                        |
|----------------------------------------------------------------------------|------------------------|------------------------|------------------------|------------------------|------------------------|------------------------|------------------------|------------------------|------------------------|
| <i>T</i> / K                                                               | 293.15                 | 298.15                 | 303.15                 | 313.15                 | 323.15                 | 333.15                 | 343.15                 | 353.15                 | 363.15                 |
| <i>B</i> <sub>0</sub> / g·cm <sup>-3</sup>                                 | 1.377 69<br>± 0.000 40 | 1.373 28<br>± 0.000 42 | 1.368 91<br>± 0.000 43 | 1.360 14<br>± 0.000 35 | 1.335 36<br>± 0.000 35 | 1.342 66<br>± 0.000 41 | 1.334 01<br>± 0.000 42 | 1.325 38<br>± 0.000 43 | 1.31686<br>± 0.000 43  |
| <i>B</i> <sub>1</sub> / kg·mol <sup>-1</sup>                               | 0.048 37<br>± 0.001 5  | 0.048 22<br>± 0.001 6  | 0.048 06<br>± 0.001 6  | 0.048 11<br>± 0.001 4  | 0.048 87<br>± 0.001 6  | 0.049 28<br>± 0.001 6  | 0.049 62<br>± 0.001 6  | 0.050 14<br>± 0.001 7  | 0.05053<br>± 0.001 7   |
| <i>B</i> <sub>2</sub> / kg·dm <sup>3</sup> ·mol <sup>-2</sup> <sup>a</sup> | - 0.001 5<br>± 0.001 2 | - 0.001 4<br>± 0.001 2 | - 0.001 2<br>± 0.001 3 | - 0.001 2<br>± 0.001 0 | - 0.001 7<br>± 0.001 2 | - 0.001 7<br>± 0.001 3 | - 0.001 7<br>± 0.001 3 | - 0.001 9<br>± 0.001 3 | - 0.002 1<br>± 0.001 4 |
| 10 <sup>6</sup> $\sigma$ / g·cm <sup>-3</sup> <sup>c</sup>                 | 440                    | 460                    | 470                    | 380                    | 440                    | 450                    | 460                    | 470                    | 470                    |
| [C <sub>4</sub> mpyr][Tf <sub>2</sub> N], 0–1.26 mol·L <sup>-1</sup>       |                        |                        |                        |                        |                        |                        |                        |                        |                        |
| <i>T</i> / K                                                               | 293.15                 | 298.15                 | 303.15                 | 313.15                 | 323.15                 | 333.15                 | 343.15                 | 353.15                 | 363.15                 |
| <i>B</i> <sub>0</sub> / g·cm <sup>-3</sup>                                 | 1.398 85<br>± 0.000 22 | 1.394 44<br>± 0.000 16 | 1.390 04<br>± 0.000 11 | 1.381 26<br>± 0.000 05 | 1.372 55<br>± 0.000 03 | 1.363 87<br>± 0.000 03 | 1.355 25<br>± 0.000 02 | 1.346 68<br>± 0.000 02 | 1.338 16<br>± 0.000 03 |
| <i>B</i> <sub>1</sub> / kg·mol <sup>-1</sup>                               | 0.020 54<br>± 0.000 84 | 0.020 41<br>± 0.000 61 | 0.020 22<br>± 0.000 42 | 0.019 91<br>± 0.000 17 | 0.019 58<br>± 0.000 11 | 0.019 22<br>± 0.000 11 | 0.019 62<br>± 0.000 09 | 0.018 89<br>± 0.000 09 | 0.017 95<br>± 0.000 12 |
| <i>B</i> <sub>2</sub> / kg·dm <sup>3</sup> ·mol <sup>-2</sup>              | 0.003 29<br>± 0.000 64 | 0.003 25<br>± 0.000 47 | 0.003 27<br>± 0.000 33 | 0.003 25<br>± 0.000 14 | 0.00319<br>± 0.000 08  | 0.003 12<br>± 0.000 08 | 0.002 44<br>± 0.000 07 | 0.002 64<br>± 0.000 08 | 0.002 90<br>± 0.000 09 |
| 10 <sup>6</sup> $\sigma$ / g·cm <sup>-3</sup> <sup>c</sup>                 | 240                    | 170                    | 120                    | 49                     | 30                     | 30                     | 26                     | 26                     | 32                     |



**Table S4a.** Intra-diffusion Coefficient Data for {AlCl<sub>3</sub> + [C<sub>2</sub>TMEDA][Tf<sub>2</sub>N]}, Steady Gradient Technique (UNSW, Canberra)

| {AlCl <sub>3</sub> + [C <sub>2</sub> TMEDA][Tf <sub>2</sub> N]} |                                                                             |             |                                                                             |                             |                                                                             |             |                                                                             |                             |                                                                             |             |                                                                             |
|-----------------------------------------------------------------|-----------------------------------------------------------------------------|-------------|-----------------------------------------------------------------------------|-----------------------------|-----------------------------------------------------------------------------|-------------|-----------------------------------------------------------------------------|-----------------------------|-----------------------------------------------------------------------------|-------------|-----------------------------------------------------------------------------|
| 0.2005 mol·kg <sup>-1</sup>                                     |                                                                             |             |                                                                             | 0.5034 mol·kg <sup>-1</sup> |                                                                             |             |                                                                             | 0.7027 mol·kg <sup>-1</sup> |                                                                             |             |                                                                             |
| <i>T</i> /K                                                     | 10 <sup>12</sup><br><i>D</i> <sub>S+</sub> /m <sup>2</sup> ·s <sup>-1</sup> | <i>T</i> /K | 10 <sup>12</sup> <i>D</i> <sub>S-</sub><br>/m <sup>2</sup> ·s <sup>-1</sup> | <i>T</i> /K                 | 10 <sup>12</sup><br><i>D</i> <sub>S+</sub> /m <sup>2</sup> ·s <sup>-1</sup> | <i>T</i> /K | 10 <sup>12</sup> <i>D</i> <sub>S-</sub><br>/m <sup>2</sup> ·s <sup>-1</sup> | <i>T</i> /K                 | 10 <sup>12</sup><br><i>D</i> <sub>S+</sub> /m <sup>2</sup> ·s <sup>-1</sup> | <i>T</i> /K | 10 <sup>12</sup> <i>D</i> <sub>S-</sub><br>/m <sup>2</sup> ·s <sup>-1</sup> |
| 303.11                                                          | 11.20                                                                       | 318.14      | 18.86                                                                       | 323.02                      | 17.57                                                                       | 328.02      | 19.54                                                                       | 328.10                      | 14.17                                                                       | 328.10      | 14.80                                                                       |
| 303.14                                                          | 10.53                                                                       | 318.14      | 18.75                                                                       | 323.03                      | 16.90                                                                       | 328.04      | 19.39                                                                       | 328.12                      | 14.71                                                                       | 328.10      | 14.76                                                                       |
| 303.16                                                          | 10.58                                                                       | 318.14      | 19.24                                                                       | 323.04                      | 17.62                                                                       | 328.04      | 19.86                                                                       | 328.16                      | 14.22                                                                       | 328.10      | 14.82                                                                       |
| 303.16                                                          | 11.51                                                                       | 318.15      | 20.33                                                                       | 328.06                      | 21.81                                                                       | 328.04      | 18.87                                                                       | 333.02                      | 17.45                                                                       | 332.82      | 18.20                                                                       |
| 308.12                                                          | 13.82                                                                       | 322.93      | 24.12                                                                       | 328.06                      | 21.85                                                                       | 333.25      | 25.15                                                                       | 333.03                      | 18.06                                                                       | 338.33      | 23.18                                                                       |
| 308.16                                                          | 14.11                                                                       | 322.98      | 23.68                                                                       | 328.07                      | 20.86                                                                       | 333.27      | 24.47                                                                       | 333.04                      | 17.73                                                                       | 338.33      | 23.30                                                                       |
| 308.17                                                          | 13.65                                                                       | 322.98      | 24.29                                                                       | 328.08                      | 21.27                                                                       | 333.28      | 24.81                                                                       | 338.21                      | 21.69                                                                       | 338.33      | 22.71                                                                       |
| 308.18                                                          | 13.11                                                                       | 322.98      | 23.47                                                                       | 333.12                      | 27.19                                                                       | 333.29      | 25.66                                                                       | 338.25                      | 22.31                                                                       | 343.03      | 29.59                                                                       |
| 313.14                                                          | 17.98                                                                       | 323.03      | 24.19                                                                       | 333.13                      | 27.19                                                                       | 338.27      | 31.53                                                                       | 338.25                      | 22.13                                                                       | 343.18      | 28.75                                                                       |
| 313.15                                                          | 17.00                                                                       | 323.03      | 23.56                                                                       | 333.22                      | 26.32                                                                       | 343.23      | 37.24                                                                       | 338.28                      | 21.54                                                                       | 343.19      | 28.18                                                                       |
| 313.15                                                          | 18.17                                                                       | 323.03      | 22.62                                                                       | 338.22                      | 31.36                                                                       | 343.24      | 36.20                                                                       | 342.91                      | 27.18                                                                       | 343.22      | 28.39                                                                       |
| 313.15                                                          | 17.43                                                                       | 323.07      | 23.29                                                                       | 338.22                      | 30.96                                                                       | 343.33      | 34.98                                                                       | 342.91                      | 28.13                                                                       | 347.98      | 36.76                                                                       |
| 318.00                                                          | 21.59                                                                       | 328.09      | 29.93                                                                       | 338.22                      | 32.06                                                                       | 348.16      | 37.83                                                                       | 342.92                      | 27.23                                                                       | 347.99      | 36.25                                                                       |
| 318.00                                                          | 22.03                                                                       | 328.10      | 27.86                                                                       | 338.22                      | 31.91                                                                       | 348.19      | 38.48                                                                       | 342.93                      | 29.09                                                                       | 348.01      | 34.06                                                                       |
| 318.00                                                          | 22.69                                                                       | 328.10      | 28.20                                                                       | 343.04                      | 39.37                                                                       | 348.24      | 46.56                                                                       | 347.76                      | 32.14                                                                       | 348.01      | 33.00                                                                       |
| 318.02                                                          | 21.52                                                                       | 328.10      | 31.22                                                                       | 343.07                      | 39.22                                                                       | 352.91      | 46.16                                                                       | 347.76                      | 31.11                                                                       | 348.02      | 35.00                                                                       |

|        |       |        |       |        |       |        |       |                                   |       |        |       |
|--------|-------|--------|-------|--------|-------|--------|-------|-----------------------------------|-------|--------|-------|
| 322.98 | 26.31 | 328.10 | 29.78 | 348.01 | 43.55 | 352.92 | 45.32 | 347.79                            | 32.49 | 348.02 | 33.45 |
| 323.00 | 26.17 | 328.11 | 28.40 | 348.02 | 44.10 | 352.94 | 53.32 | 347.81                            | 32.70 | 348.08 | 33.78 |
| 323.00 | 26.82 | 328.13 | 30.20 | 348.02 | 44.10 | 358.36 | 53.89 | 352.43                            | 39.69 | 352.87 | 41.56 |
| 323.01 | 25.83 | 328.14 | 29.54 | 348.05 | 42.85 | 358.40 | 51.72 | 352.73                            | 40.79 | 352.88 | 39.80 |
| 328.09 | 32.02 | 333.12 | 37.98 | 357.63 | 58.31 | 358.40 | 63.47 | 352.73                            | 41.08 | 358.22 | 49.95 |
| 328.11 | 31.69 | 333.16 | 35.54 | 357.65 | 60.25 | 363.90 | 64.54 | 352.74                            | 39.37 | 358.24 | 50.44 |
| 328.11 | 32.56 | 333.16 | 37.73 | 357.69 | 58.64 | 363.91 | 59.69 | 357.72                            | 46.83 | 358.24 | 52.08 |
| 328.13 | 33.28 | 333.18 | 35.32 | 363.41 | 73.32 | 363.91 | 74.68 | 357.77                            | 46.51 | 363.59 | 55.62 |
| 332.84 | 38.40 | 338.28 | 44.11 | 363.42 | 73.85 | 328.02 | 75.77 | 357.80                            | 45.37 | 363.62 | 60.54 |
| 333.02 | 38.41 | 338.28 | 43.71 | 363.42 | 72.94 | 328.04 | 76.55 | 357.94                            | 47.44 | 363.68 | 56.33 |
| 333.05 | 38.63 | 338.30 | 44.46 |        |       |        |       | 363.09                            | 56.11 |        |       |
| 333.28 | 38.88 | 338.33 | 41.68 |        |       |        |       | 363.10                            | 55.31 |        |       |
| 338.22 | 45.74 | 342.99 | 49.82 |        |       |        |       | 363.11                            | 54.93 |        |       |
| 338.23 | 45.93 | 343.00 | 50.74 |        |       |        |       | 363.12                            | 56.84 |        |       |
| 338.25 | 45.98 | 343.01 | 50.86 |        |       |        |       | <b>1.0038 mol·kg<sup>-1</sup></b> |       |        |       |
| 338.26 | 46.26 | 343.02 | 51.47 |        |       |        |       | 328.08                            | 9.34  | 328.22 | 9.83  |
| 343.04 | 55.48 | 347.72 | 59.10 |        |       |        |       | 333.07                            | 11.51 | 328.30 | 9.68  |
| 343.05 | 52.91 | 347.95 | 58.76 |        |       |        |       | 333.07                            | 11.34 | 333.29 | 12.74 |
| 343.08 | 52.24 | 347.98 | 59.89 |        |       |        |       | 333.08                            | 11.99 | 333.30 | 12.25 |
| 343.08 | 53.82 | 352.83 | 68.60 |        |       |        |       | 338.12                            | 14.56 | 333.30 | 12.38 |
| 347.99 | 63.51 | 352.86 | 70.85 |        |       |        |       | 338.13                            | 14.53 | 338.43 | 16.17 |
| 348.01 | 63.61 | 352.90 | 69.53 |        |       |        |       | 338.13                            | 14.65 | 338.43 | 15.91 |

|        |       |        |       |  |  |  |  |        |       |        |       |
|--------|-------|--------|-------|--|--|--|--|--------|-------|--------|-------|
| 348.03 | 60.73 | 352.90 | 67.48 |  |  |  |  | 338.14 | 14.75 | 338.43 | 16.65 |
| 348.05 | 61.04 | 358.21 | 79.29 |  |  |  |  | 342.67 | 17.43 | 338.44 | 15.93 |
| 352.51 | 70.71 | 358.21 | 78.36 |  |  |  |  | 342.96 | 17.85 | 342.61 | 18.77 |
| 352.77 | 70.15 | 358.22 | 77.48 |  |  |  |  | 342.98 | 18.42 | 342.62 | 19.36 |
| 352.78 | 71.40 | 363.52 | 90.12 |  |  |  |  | 343.00 | 18.21 | 342.64 | 20.28 |
| 352.79 | 72.54 | 363.53 | 91.42 |  |  |  |  | 347.96 | 21.63 | 342.64 | 20.51 |
| 357.83 | 81.26 | 363.57 | 90.52 |  |  |  |  | 348.30 | 22.22 | 343.03 | 19.10 |
| 357.85 | 86.64 |        |       |  |  |  |  | 352.61 | 26.81 | 343.03 | 19.50 |
| 357.85 | 80.92 |        |       |  |  |  |  | 352.62 | 25.56 | 348.35 | 25.03 |
| 357.86 | 84.23 |        |       |  |  |  |  | 352.65 | 27.02 | 348.35 | 25.58 |
| 363.21 | 91.31 |        |       |  |  |  |  | 352.68 | 26.28 | 348.35 | 26.06 |
| 363.21 | 94.17 |        |       |  |  |  |  | 358.00 | 32.83 | 348.51 | 25.91 |
| 363.21 | 93.43 |        |       |  |  |  |  | 358.01 | 32.80 | 353.20 | 29.73 |
| 363.23 | 92.89 |        |       |  |  |  |  | 358.02 | 33.09 | 353.23 | 30.38 |
|        |       |        |       |  |  |  |  | 358.03 | 32.05 | 353.23 | 30.78 |
|        |       |        |       |  |  |  |  | 363.37 | 40.92 | 358.42 | 37.04 |
|        |       |        |       |  |  |  |  | 363.37 | 41.47 | 358.42 | 37.45 |
|        |       |        |       |  |  |  |  | 363.37 | 40.06 | 358.46 | 35.66 |
|        |       |        |       |  |  |  |  | 363.39 | 41.48 | 363.84 | 45.56 |
|        |       |        |       |  |  |  |  |        |       | 363.86 | 45.16 |

**Table S4b.** Intra-diffusion Coefficient Data for {AlCl<sub>3</sub> + [C<sub>4</sub>mpyr][Tf<sub>2</sub>N]}, Steady Gradient Technique (UNSW, Canberra)

| {AlCl <sub>3</sub> + [C <sub>4</sub> mpyr][Tf <sub>2</sub> N]} |                                                                           |            |                                                                           |                             |                                                                           |            |                                                                           |                                              |                                                                           |            |                                                                           |
|----------------------------------------------------------------|---------------------------------------------------------------------------|------------|---------------------------------------------------------------------------|-----------------------------|---------------------------------------------------------------------------|------------|---------------------------------------------------------------------------|----------------------------------------------|---------------------------------------------------------------------------|------------|---------------------------------------------------------------------------|
| 0.1995 mol·kg <sup>-1</sup>                                    |                                                                           |            |                                                                           | 0.5003 mol·kg <sup>-1</sup> |                                                                           |            |                                                                           | 0.6997 mol·kg <sup>-1</sup>                  |                                                                           |            |                                                                           |
| <i>T/K</i>                                                     | 10 <sup>12</sup><br><i>D<sub>S</sub></i> /m <sup>2</sup> ·s <sup>-1</sup> | <i>T/K</i> | 10 <sup>12</sup> <i>D<sub>S</sub></i><br>/m <sup>2</sup> ·s <sup>-1</sup> | <i>T/K</i>                  | 10 <sup>12</sup><br><i>D<sub>S</sub></i> /m <sup>2</sup> ·s <sup>-1</sup> | <i>T/K</i> | 10 <sup>12</sup> <i>D<sub>S</sub></i><br>/m <sup>2</sup> ·s <sup>-1</sup> | <i>T/K</i>                                   | 10 <sup>12</sup><br><i>D<sub>S</sub></i> /m <sup>2</sup> ·s <sup>-1</sup> | <i>T/K</i> | 10 <sup>12</sup> <i>D<sub>S</sub></i><br>/m <sup>2</sup> ·s <sup>-1</sup> |
| 298.24                                                         | 14.09                                                                     | 298.17     | 11.71                                                                     | 302.97                      | 16.13                                                                     | 312.94     | 19.93                                                                     | 308.13                                       | 17.46                                                                     | 308.14     | 15.84                                                                     |
| 303.33                                                         | 17.98                                                                     | 303.02     | 14.73                                                                     | 308.15                      | 21.31                                                                     | 318.13     | 25.46                                                                     | 313.03                                       | 21.80                                                                     | 313.00     | 19.86                                                                     |
| 308.20                                                         | 22.70                                                                     | 303.06     | 14.87                                                                     | 313.00                      | 26.64                                                                     | 323.13     | 30.00                                                                     | 318.06                                       | 27.79                                                                     | 318.10     | 22.75                                                                     |
| 313.04                                                         | 27.04                                                                     | 308.05     | 18.16                                                                     | 318.25                      | 32.44                                                                     | 323.31     | 31.33                                                                     | 323.20                                       | 33.62                                                                     | 323.14     | 28.22                                                                     |
| 317.90                                                         | 33.31                                                                     | 313.05     | 23.34                                                                     | 322.71                      | 36.73                                                                     | 328.15     | 36.03                                                                     | 323.23                                       | 34.91                                                                     | 323.06     | 29.03                                                                     |
| 317.94                                                         | 34.98                                                                     | 318.11     | 28.01                                                                     | 323.07                      | 37.63                                                                     | 333.19     | 44.14                                                                     | 323.24                                       | 33.30                                                                     | 327.66     | 34.96                                                                     |
| 323.10                                                         | 42.39                                                                     | 323.26     | 34.78                                                                     | 323.49                      | 39.43                                                                     | 338.22     | 50.32                                                                     | 328.14                                       | 39.81                                                                     | 333.26     | 43.21                                                                     |
| 323.24                                                         | 42.21                                                                     | 328.21     | 41.77                                                                     | 328.12                      | 45.62                                                                     | 343.21     | 59.81                                                                     | 333.08                                       | 47.39                                                                     | 338.28     | 50.51                                                                     |
| 323.25                                                         | 39.85                                                                     | 333.13     | 50.28                                                                     | 333.08                      | 54.45                                                                     | 348.17     | 65.43                                                                     | 338.11                                       | 57.92                                                                     | 343.08     | 57.91                                                                     |
| 328.01                                                         | 47.89                                                                     | 333.15     | 48.03                                                                     | 337.97                      | 62.62                                                                     | 352.72     | 77.41                                                                     | 343.15                                       | 67.74                                                                     | 348.26     | 69.88                                                                     |
| 333.05                                                         | 57.35                                                                     | 338.16     | 57.28                                                                     | 342.97                      | 71.89                                                                     | 353.68     | 77.82                                                                     | 348.11                                       | 78.71                                                                     | 353.17     | 81.69                                                                     |
| 337.96                                                         | 66.71                                                                     | 343.16     | 65.72                                                                     | 343.04                      | 73.26                                                                     | 357.93     | 93.08                                                                     | 352.96                                       | 90.79                                                                     | 358.18     | 86.03                                                                     |
| 343.08                                                         | 78.36                                                                     | 348.18     | 77.06                                                                     | 343.28                      | 74.47                                                                     | 358.09     | 86.52                                                                     | 358.08                                       | 102.6                                                                     | 363.54     | 98.74                                                                     |
| 348.00                                                         | 90.31                                                                     | 352.99     | 87.48                                                                     | 347.89                      | 85.03                                                                     | 363.15     | 102.3                                                                     | 363.50                                       | 117.9                                                                     |            |                                                                           |
| 348.07                                                         | 89.68                                                                     | 357.94     | 100.1                                                                     | 352.93                      | 95.76                                                                     | 363.57     | 105.2                                                                     | <b>1.000<sub>1</sub> mol·kg<sup>-1</sup></b> |                                                                           |            |                                                                           |
| 353.05                                                         | 100.8                                                                     | 358.19     | 98.35                                                                     | 353.17                      | 97.31                                                                     |            |                                                                           | 313.12                                       | 19.66                                                                     | 323.15     | 24.37                                                                     |

|                              |       |        |       |        |       |  |  |        |       |        |        |
|------------------------------|-------|--------|-------|--------|-------|--|--|--------|-------|--------|--------|
| 353.05                       | 104.0 | 363.49 | 109.4 | 357.93 | 112.8 |  |  | 318.17 | 24.41 | 323.17 | 24.04  |
| 358.04                       | 111.7 | 363.52 | 115.8 | 358.05 | 113.2 |  |  | 323.20 | 29.62 | 323.20 | 23.58  |
| 358.06                       | 118.4 |        |       | 363.22 | 128.9 |  |  | 323.12 | 30.95 | 328.03 | 28.01  |
| 363.29                       | 132.6 |        |       | 363.33 | 129.0 |  |  | 323.24 | 29.77 | 328.18 | 27.93  |
| 363.39                       | 126.7 |        |       | 363.46 | 131.2 |  |  | 328.15 | 35.56 | 333.12 | 33.96  |
| 363.48                       | 137.4 |        |       |        |       |  |  | 333.18 | 44.23 | 333.12 | 35.49  |
| <b>0 mol·kg<sup>-1</sup></b> |       |        |       |        |       |  |  | 338.03 | 54.24 | 338.02 | 338.03 |
| 298.89                       | 17.06 | 303.27 | 17.44 |        |       |  |  | 338.06 | 53.69 | 343.02 | 47.64  |
| 303.30                       | 20.70 | 312.94 | 25.58 |        |       |  |  | 343.02 | 62.68 | 343.34 | 49.94  |
| 313.04                       | 31.49 | 323.39 | 38.69 |        |       |  |  | 348.19 | 73.20 | 347.98 | 53.73  |
| 322.76                       | 44.81 | 333.18 | 52.64 |        |       |  |  | 352.99 | 81.35 | 347.98 | 55.72  |
| 333.08                       | 63.35 | 343.18 | 70.45 |        |       |  |  | 353.15 | 85.74 | 353.00 | 65.02  |
| 343.17                       | 84.61 | 353.64 | 93.08 |        |       |  |  | 358.11 | 94.22 | 353.27 | 66.25  |
| 353.49                       | 109.8 | 363.54 | 116.5 |        |       |  |  | 363.28 | 112.4 | 357.95 | 77.15  |
| 363.49                       | 137.5 |        |       |        |       |  |  | 363.36 | 109.1 | 358.01 | 74.75  |
|                              |       |        |       |        |       |  |  | 363.41 | 109.9 | 363.27 | 82.28  |
|                              |       |        |       |        |       |  |  |        |       | 363.31 | 87.64  |

**Table S5a.** Intra-diffusion Coefficient Data for {AlCl<sub>3</sub> + [C<sub>2</sub>TMEDA][Tf<sub>2</sub>N]}, Pulsed Gradient Technique (WSU)

|             | {AlCl <sub>3</sub> + [C <sub>2</sub> TMEDA][Tf <sub>2</sub> N]}             |                                                                             |                                                                               |                                                                             |                                                                             |                                                                             |                                                                             |                                                                             |                                                                             |
|-------------|-----------------------------------------------------------------------------|-----------------------------------------------------------------------------|-------------------------------------------------------------------------------|-----------------------------------------------------------------------------|-----------------------------------------------------------------------------|-----------------------------------------------------------------------------|-----------------------------------------------------------------------------|-----------------------------------------------------------------------------|-----------------------------------------------------------------------------|
|             | 0.1607 mol·kg <sup>-1</sup>                                                 |                                                                             |                                                                               | 0.3994 mol·kg <sup>-1</sup>                                                 |                                                                             | 0.5587 mol·kg <sup>-1</sup>                                                 |                                                                             | 0.7950 mol·kg <sup>-1</sup>                                                 |                                                                             |
| <i>T</i> /K | 10 <sup>12</sup><br><i>D</i> <sub>S+</sub> /m <sup>2</sup> ·s <sup>-1</sup> | 10 <sup>12</sup> <i>D</i> <sub>S-</sub><br>/m <sup>2</sup> ·s <sup>-1</sup> | 10 <sup>12</sup><br><i>D</i> <sub>S,Al</sub> /m <sup>2</sup> ·s <sup>-1</sup> | 10 <sup>12</sup><br><i>D</i> <sub>S+</sub> /m <sup>2</sup> ·s <sup>-1</sup> | 10 <sup>12</sup> <i>D</i> <sub>S-</sub><br>/m <sup>2</sup> ·s <sup>-1</sup> | 10 <sup>12</sup><br><i>D</i> <sub>S+</sub> /m <sup>2</sup> ·s <sup>-1</sup> | 10 <sup>12</sup> <i>D</i> <sub>S-</sub><br>/m <sup>2</sup> ·s <sup>-1</sup> | 10 <sup>12</sup><br><i>D</i> <sub>S+</sub> /m <sup>2</sup> ·s <sup>-1</sup> | 10 <sup>12</sup> <i>D</i> <sub>S-</sub><br>/m <sup>2</sup> ·s <sup>-1</sup> |
| 303.00      | 12.42                                                                       | 9.92                                                                        | -                                                                             | 7.40                                                                        | -                                                                           | 5.63                                                                        | -                                                                           | 3.28                                                                        | 3.42                                                                        |
| 303.00      | -                                                                           | -                                                                           | -                                                                             | -                                                                           | -                                                                           | -                                                                           | -                                                                           | 3.45                                                                        | 3.57                                                                        |
| 303.00      | -                                                                           | -                                                                           | -                                                                             | -                                                                           | -                                                                           | -                                                                           | -                                                                           | -                                                                           | 3.65                                                                        |
| 313.00      | 19.62                                                                       | 16.10                                                                       | -                                                                             | -                                                                           | -                                                                           | 9.79                                                                        | -                                                                           | 5.88                                                                        | 6.57                                                                        |
| 313.00      | -                                                                           | 17.73                                                                       | -                                                                             | -                                                                           | -                                                                           | -                                                                           | -                                                                           | 6.53                                                                        | -                                                                           |
| 313.00      | -                                                                           | -                                                                           | -                                                                             | -                                                                           | -                                                                           | -                                                                           | -                                                                           | 6.28                                                                        | -                                                                           |
| 323.00      | 28.00                                                                       | 24.09                                                                       | -                                                                             | 20.84                                                                       | -                                                                           | 15.55                                                                       | 15.21                                                                       | <b>9.56<sup>a</sup></b>                                                     | -                                                                           |
| 323.00      | -                                                                           | 26.60                                                                       | -                                                                             | -                                                                           | -                                                                           | -                                                                           | 15.94                                                                       | 10.14                                                                       | 10.51                                                                       |
| 323.00      | -                                                                           | -                                                                           | -                                                                             | -                                                                           | -                                                                           | -                                                                           | -                                                                           | 11.04                                                                       | 11.29                                                                       |
| 333.00      | -                                                                           | -                                                                           | -                                                                             | -                                                                           | -                                                                           | -                                                                           | -                                                                           | <b>15.46</b>                                                                | 17.06                                                                       |
| 333.00      | 38.60                                                                       | -                                                                           | -                                                                             | 29.92                                                                       | -                                                                           | 22.88                                                                       | 23.70                                                                       | 15.86                                                                       | 18.15                                                                       |
| 333.00      | -                                                                           | -                                                                           | -                                                                             | -                                                                           | -                                                                           | 24.22                                                                       | 24.65                                                                       | 17.21                                                                       | -                                                                           |
| 338.00      | -                                                                           | -                                                                           | <b>40.08</b>                                                                  | 36.00                                                                       | 34.91                                                                       | 27.73                                                                       | 27.78                                                                       | 19.33                                                                       | 20.13                                                                       |
| 338.00      | -                                                                           | -                                                                           | -                                                                             | -                                                                           | -                                                                           | 28.72                                                                       | 28.51                                                                       | 21.11                                                                       | 21.08                                                                       |
| 338.56      | <b>46.16</b>                                                                | -                                                                           | -                                                                             | <b>33.76</b>                                                                | -                                                                           | <b>28.05</b>                                                                | -                                                                           | <b>19.98</b>                                                                | -                                                                           |
| 343.05      | <b>55.42</b>                                                                | -                                                                           | -                                                                             | <b>40.20</b>                                                                | -                                                                           | <b>34.49</b>                                                                | -                                                                           | <b>24.71</b>                                                                | -                                                                           |

<sup>a</sup> Bold entries indicate measurements made with the 500 MHz (<sup>1</sup>H) NMR spectrometer, normal font indicates the 600 MHz spectrometer.

**Table S5b.** Intra-diffusion Coefficient Data for {AlCl<sub>3</sub> + [C<sub>4</sub>mpyr][Tf<sub>2</sub>N]}, Pulsed Gradient Technique (WSU).

| {AlCl <sub>3</sub> - [C <sub>4</sub> mpyr][Tf <sub>2</sub> N]} |                                                                             |                                                                               |                                                                             |                                                                               |                                                                             |                                                                               |                                                                             |                                                                               |
|----------------------------------------------------------------|-----------------------------------------------------------------------------|-------------------------------------------------------------------------------|-----------------------------------------------------------------------------|-------------------------------------------------------------------------------|-----------------------------------------------------------------------------|-------------------------------------------------------------------------------|-----------------------------------------------------------------------------|-------------------------------------------------------------------------------|
|                                                                | 0.1995 mol·kg <sup>-1</sup>                                                 |                                                                               | 0.5003 mol·kg <sup>-1</sup>                                                 |                                                                               | 0.6997 mol·kg <sup>-1</sup>                                                 |                                                                               | 1.000 <sub>1</sub> mol·kg <sup>-1</sup>                                     |                                                                               |
| <i>T</i> /K                                                    | 10 <sup>12</sup><br><i>D</i> <sub>S+</sub> /m <sup>2</sup> ·s <sup>-1</sup> | 10 <sup>12</sup><br><i>D</i> <sub>S,Al</sub> /m <sup>2</sup> ·s <sup>-1</sup> | 10 <sup>12</sup><br><i>D</i> <sub>S+</sub> /m <sup>2</sup> ·s <sup>-1</sup> | 10 <sup>12</sup><br><i>D</i> <sub>S,Al</sub> /m <sup>2</sup> ·s <sup>-1</sup> | 10 <sup>12</sup><br><i>D</i> <sub>S+</sub> /m <sup>2</sup> ·s <sup>-1</sup> | 10 <sup>12</sup><br><i>D</i> <sub>S,Al</sub> /m <sup>2</sup> ·s <sup>-1</sup> | 10 <sup>12</sup><br><i>D</i> <sub>S+</sub> /m <sup>2</sup> ·s <sup>-1</sup> | 10 <sup>12</sup><br><i>D</i> <sub>S,Al</sub> /m <sup>2</sup> ·s <sup>-1</sup> |
| 303.00                                                         | 17.8 <sup>a</sup>                                                           | 14.9                                                                          | 15.2                                                                        | 13.3                                                                          | 13.6                                                                        | 11.9                                                                          | 11.2                                                                        | 9.72                                                                          |
| 303.00                                                         | 17.7                                                                        | 14.8                                                                          | 15.2                                                                        | 13.1                                                                          | 13.5                                                                        | 11.9                                                                          | 11.2                                                                        | 9.23                                                                          |
| 313.00                                                         | 27.4                                                                        | 23.5                                                                          | 23.6                                                                        | 20.4                                                                          | 21.7                                                                        | 18.9                                                                          | 18.8                                                                        | 16.4                                                                          |
| 313.00                                                         | 27.5                                                                        | 23.4                                                                          | 23.5                                                                        | 20.4                                                                          | 21.7                                                                        | 18.8                                                                          | 18.6                                                                        | 16.1                                                                          |
| 323.00                                                         | 41.2                                                                        | 35.1                                                                          | 35.7                                                                        | 31.0                                                                          | 33.4                                                                        | 29.0                                                                          | 28.8                                                                        | 25.1                                                                          |
| 323.00                                                         | 41.1                                                                        | 35.4                                                                          | 35.7                                                                        | 30.9                                                                          | 33.5                                                                        | 29.1                                                                          | 29.0                                                                        | 25.2                                                                          |
| 333.00                                                         | 57.6                                                                        | 49.8                                                                          | 52.5                                                                        | 45.7                                                                          | 48.0                                                                        | 41.8                                                                          | 43.4                                                                        | 38.1                                                                          |
| 333.00                                                         | 57.7                                                                        | 50.5                                                                          | 52.5                                                                        | 45.8                                                                          | 47.9                                                                        | 41.7                                                                          | 43.3                                                                        | 37.5                                                                          |
| 338.00                                                         | 65.8                                                                        | 56.9                                                                          | 60.0                                                                        | 52.0                                                                          | 55.3                                                                        | 48.7                                                                          | 49.9                                                                        | 43.6                                                                          |
| 338.00.                                                        | 65.9                                                                        | 56.6                                                                          | 59.8                                                                        | 52.1                                                                          | 55.4                                                                        | 48.7                                                                          | 50.0                                                                        | 43.5                                                                          |

<sup>a</sup> Measurements made with the 500 MHz (<sup>1</sup>H) NMR spectrometer; <sup>27</sup>Al-resonance: δ<sub>Al</sub> = 104.8 ppm at 130.32 MHz.

**Table S6.** Coefficients for Fits to Eqn (15) [ $\ln D_{Si} = \varepsilon + \zeta m$ ] for Experimental Isotherms Using Smoothed Data from Litovitz Fits at Each Composition.

| <b>{AlCl<sub>3</sub> + [C<sub>2</sub>TMEDA][Tf<sub>2</sub>N]}</b> |               |                               |                                         |               |                               |                                         |
|-------------------------------------------------------------------|---------------|-------------------------------|-----------------------------------------|---------------|-------------------------------|-----------------------------------------|
| 20 MHz NMR                                                        |               |                               |                                         |               |                               |                                         |
| <i>T</i> /K                                                       | $\varepsilon$ | $\zeta$ /kg·mol <sup>-1</sup> | <i>m</i> range/<br>mol·kg <sup>-1</sup> | $\varepsilon$ | $\zeta$ /kg·mol <sup>-1</sup> | <i>m</i> range/<br>mol·kg <sup>-1</sup> |
| cation                                                            |               |                               | anion                                   |               |                               |                                         |
| 303                                                               | 2.749         | -1.807                        | 0 – 0.2                                 | -             | -                             | -                                       |
| 323                                                               | 3.594         | -1.472                        | 0 – 0.5                                 | 3.508         | -1.6371                       | 0 – 0.2                                 |
| 328                                                               | 3.826         | -1.619                        | 0.2 - 1                                 | 3.655         | -1.370                        | 0.2 - 1                                 |
| 333                                                               | 3.969         | -1.504                        | 0 - 1                                   | 3.935         | -1.394                        | 0 - 1                                   |
| 338                                                               | 4.139         | -1.443                        | 0.2 - 1                                 | 4.024         | -1.239                        | 0.2 - 1                                 |
| 343                                                               | 4.274         | -1.352                        | 0 - 1                                   | 4.193         | -1.204                        | 0 - 1                                   |
| 348                                                               | 4.413         | -1.283                        | 0 - 1                                   | 4.356         | -1.126                        | 0 - 1                                   |
| 353                                                               | 4.537         | -1.219                        | 0 - 1                                   | 4.459         | -1.041                        | 0 - 1                                   |
| 358                                                               | 4.663         | -1.147                        | 0 - 1                                   | 4.601         | -0.9789                       | 0 - 1                                   |
| 363                                                               | 4.787         | -1.097                        | 0 - 1                                   | 4.771         | -0.9752                       | 0 - 1                                   |
| 500 & 600 MHz NMR                                                 |               |                               | 600 MHz NMR                             |               |                               |                                         |
| cation                                                            |               |                               | anion                                   |               |                               |                                         |
| 303                                                               | 2.858         | -2.031                        | 0.16 – 0.8                              | 2.555         | -1.622                        | 0.16 – 0.8                              |
| 313                                                               | 3.259         | -1.794                        | 0.16 – 0.8                              | 3.066         | -1.489                        | 0.16 – 0.8                              |
| 323                                                               | 3.612         | -1.585                        | 0.16 – 0.8                              | 3.454         | -1.318                        | 0.16 – 0.8                              |
| 333                                                               | 3.924         | -1.400                        | 0.16 – 0.8                              | 3.936         | -1.344                        | 0.6 – 0.8                               |
| 338                                                               | 4.066         | -1.316                        | 0.16 – 0.8                              | 4.082         | -1.330                        | 0.4 – 0.8                               |
| 343                                                               | 4.201         | -1.237                        | 0.16 – 0.8                              | -             | -                             | -                                       |
| <b>{AlCl<sub>3</sub> + [C<sub>4</sub>mpyr][Tf<sub>2</sub>N]}</b>  |               |                               |                                         |               |                               |                                         |
| 20 and 600 MHz NMR                                                |               |                               | 20 MHz NMR                              |               |                               |                                         |
| <i>T</i> /K                                                       | $\varepsilon$ | $\zeta$ /kg·mol <sup>-1</sup> | <i>m</i> range/<br>mol·kg <sup>-1</sup> | $\varepsilon$ | $\zeta$ /kg·mol <sup>-1</sup> | <i>m</i> range/<br>mol·kg <sup>-1</sup> |
| cation                                                            |               |                               | anion                                   |               |                               |                                         |
| 298                                                               | 2.826         | -0.9248                       | 0 – 0.2                                 | 2.649         | -0.9962                       | 0 – 0.2                                 |
| 303                                                               | 3.033         | -0.5909                       | 0 – 1                                   | 2.881         | -0.9173                       | 0 – 0.2                                 |
| 308                                                               | 3.219         | -0.4937                       | 0 – 0.7                                 | 3.004         | -0.3760                       | 0.2 – 0.7                               |
| 313                                                               | 3.450         | -0.5045                       | 0 – 1                                   | 3.271         | -0.4715                       | 0 – 0.7                                 |
| 318                                                               | 3.627         | -0.4482                       | 0.2 – 1                                 | 3.411         | -0.3463                       | 0.2 – 0.7                               |
| 323                                                               | 3.817         | -0.4285                       | 0 - 1                                   | 3.660         | -0.4729                       | 0 - 1                                   |
| 328                                                               | 3.978         | -0.3858                       | 0.2 – 1                                 | 3.821         | -0.4355                       | 0.2 – 1                                 |
| 333                                                               | 4.141         | -0.3613                       | 0 - 1                                   | 3.991         | -0.4246                       | 0 - 1                                   |
| 338                                                               | 4.289         | -0.3306                       | 0.2 – 1                                 | 4.140         | -0.3989                       | 0.2 – 1                                 |
| 343                                                               | 4.428         | -0.3018                       | 0 - 1                                   | 4.285         | -0.3818                       | 0 - 1                                   |
| 348                                                               | 4.560         | -0.2745                       | 0 - 1                                   | 4.420         | -0.3623                       | 0 - 1                                   |
| 353                                                               | 4.684         | -0.2488                       | 0 - 1                                   | 4.547         | -0.3438                       | 0 - 1                                   |
| 358                                                               | 4.812         | -0.2378                       | 0.2 – 1                                 | 4.675         | -0.3375                       | 0.2 – 1                                 |
| 363                                                               | 4.913         | -0.2014                       | 0 - 1                                   | 4.781         | -0.3098                       | 0 - 1                                   |
| 600 MHz NMR                                                       |               |                               |                                         |               |                               |                                         |
| Al species                                                        |               |                               |                                         |               |                               |                                         |
| 303                                                               | 2.833         | -0.5527                       | 0.2 - 1                                 |               |                               |                                         |
| 313                                                               | 3.246         | -0.4518                       | 0.2 - 1                                 |               |                               |                                         |
| 323                                                               | 3.647         | -0.4154                       | 0.2 - 1                                 |               |                               |                                         |
| 333                                                               | 3.994         | -0.3662                       | 0.2 - 1                                 |               |                               |                                         |
| 338                                                               | 4.111         | -0.3310                       | 0.2 - 1                                 |               |                               |                                         |



**Table S7.** Laity Resistance Coefficients,  $r_{ij}$ , for [C<sub>4</sub>mpyr][Tf<sub>2</sub>N], [C<sub>2</sub>TMEDA][Tf<sub>2</sub>N] and [C<sub>2</sub>dmpyz][Tf<sub>2</sub>N].

| [C <sub>4</sub> mpyr][Tf <sub>2</sub> N], |                |            |            |            |                             |
|-------------------------------------------|----------------|------------|------------|------------|-----------------------------|
| <i>T</i> /K                               | $\eta$ / mPa·s | $r_{+-}^a$ | $r_{++}^a$ | $r_{--}^a$ | $r_{+-}^2/(r_{++}r_{--})^b$ |
| 273.15                                    | 317            | 842        |            |            |                             |
| 278.15                                    | 228            | 615        |            |            |                             |
| 283.15                                    | 169            | 462        |            |            |                             |
| 288.15                                    | 128            | 355        |            |            |                             |
| 293.14                                    | 98.6           | 279        |            |            |                             |
| 298.15                                    | 77.6           | 223        | 69.1       | 122        | 0.169                       |
| 303.15                                    | 62.1           | 181        | 56.0       | 98.9       | 0.168                       |
| 313.15                                    | 41.5           | 125        | 37.9       | 66.8       | 0.162                       |
| 323.14                                    | 29.2           | 90.7       | 27.0       | 46.6       | 0.153                       |
| 333.15                                    | 21.3           | 68.4       | 19.9       | 33.3       | 0.142                       |
| 343.14                                    | 16.1           | 53.3       | 15.2       | 24.5       | 0.131                       |
| 353.15                                    | 12.6           | 42.6       | 12.0       | 18.4       | 0.121                       |

<sup>a</sup> units: 10<sup>12</sup> J s m<sup>-2</sup> mol<sup>-1</sup> <sup>b</sup> If the quantity  $[r_{+-}^2/(r_{++}r_{--})] = 1$ , the Nernst-Einstein deviation parameter,  $\Delta$ , is zero.<sup>3,4</sup>

| [C <sub>2</sub> TMEDA][Tf <sub>2</sub> N] |                |          |          |          |                           |
|-------------------------------------------|----------------|----------|----------|----------|---------------------------|
| <i>T</i> /K                               | $\eta$ / mPa·s | $r_{+-}$ | $r_{++}$ | $r_{--}$ | $r_{+-}^2/(r_{++}r_{--})$ |
| 273.15                                    | 583            | 1715     |          |          |                           |
| 278.15                                    | 391            | 1189     |          |          |                           |
| 283.15                                    | 272            | 852      |          |          |                           |
| 288.15                                    | 196            | 627      |          |          |                           |
| 293.15                                    | 145            | 474      |          |          |                           |
| 298.15                                    | 110            | 366      | 42.0     | 99.6     | 0.031                     |
| 303.15                                    | 85.3           | 288      | 34.4     | 76.8     | 0.032                     |
| 313.15                                    | 54.3           | 189      | 22.9     | 46.9     | 0.030                     |
| 323.15                                    | 36.8           | 131      | 15.7     | 30.1     | 0.028                     |
| 333.15                                    | 26.3           | 95.2     | 10.9     | 19.9     | 0.024                     |
| 343.15                                    | 19.5           | 71.9     | 8.05     | 13.9     | 0.022                     |
| 353.15                                    | 15.0           | 56.2     | 6.09     | 10.0     | 0.019                     |

| [C <sub>2</sub> dmppz][Tf <sub>2</sub> N] |                  |                        |                        |                        |                                                                                        |
|-------------------------------------------|------------------|------------------------|------------------------|------------------------|----------------------------------------------------------------------------------------|
| <i>T</i> /K                               | <i>η</i> / mPa·s | <i>r</i> <sub>+-</sub> | <i>r</i> <sub>++</sub> | <i>r</i> <sub>--</sub> | <i>r</i> <sub>+-</sub> <sup>2</sup> /( <i>r</i> <sub>++</sub> <i>r</i> <sub>--</sub> ) |
| 273.15                                    | 1757             | 4410                   |                        |                        |                                                                                        |
| 278.15                                    | 1044             | 2695                   |                        |                        |                                                                                        |
| 283.15                                    | 656              | 1734                   |                        |                        |                                                                                        |
| 288.15                                    | 432              | 1167                   |                        |                        |                                                                                        |
| 293.14                                    | 296              | 816                    |                        |                        |                                                                                        |
| 298.15                                    | 210              | 590                    | 82.9                   | 254                    | 0.061                                                                                  |
| 303.15                                    | 154              | 439                    | 68.7                   | 200                    | 0.071                                                                                  |
| 313.15                                    | 88.9             | 262                    | 43.4                   | 124                    | 0.078                                                                                  |
| 323.15                                    | 55.8             | 170                    | 26.6                   | 79.8                   | 0.074                                                                                  |
| 333.15                                    | 37.3             | 117                    | 15.8                   | 52.5                   | 0.060                                                                                  |
| 343.15                                    | 26.3             | 84.9                   | 9.54                   | 36.0                   | 0.048                                                                                  |
| 353.15                                    | 19.4             | 64.2                   | 5.61                   | 25.5                   | 0.035                                                                                  |

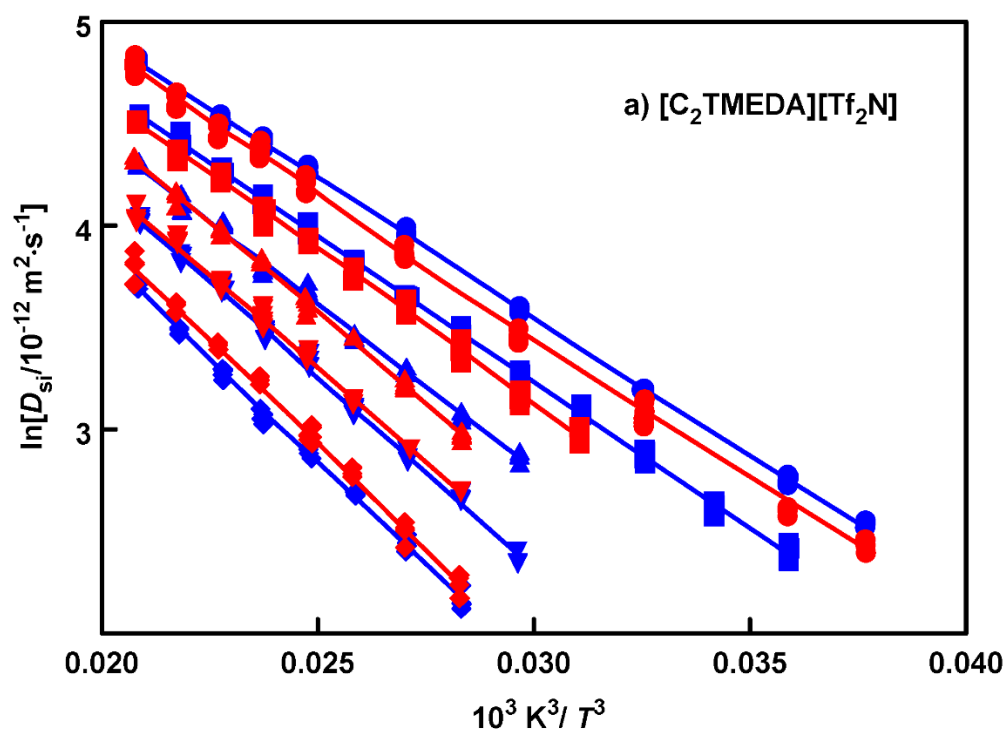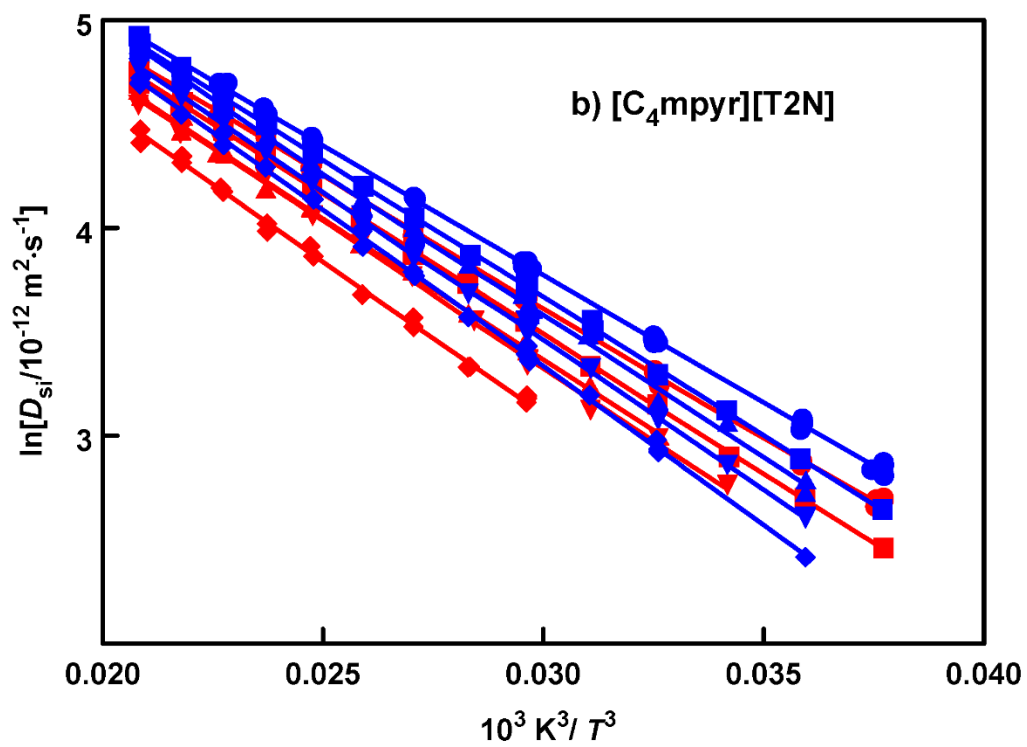

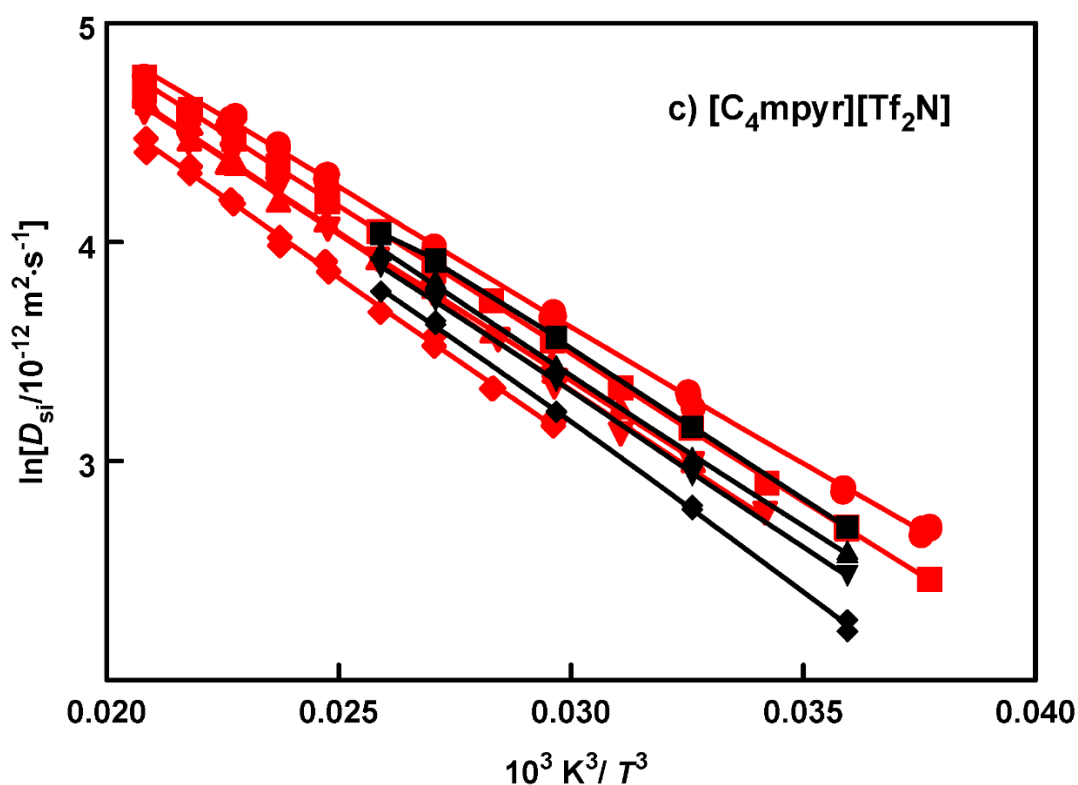

**Figure S1.** Litovitz plots of the intra-diffusion coefficients ( $D_{Si}$ ): (a) of  $[\text{C}_2\text{TMEDA}]^+$  (blue symbols) and  $[\text{Tf}_2\text{N}]^-$  (red symbols) ions in  $[\text{C}_2\text{TMEDA}][\text{Tf}_2\text{N}]$  and its mixtures with  $\text{AlCl}_3$  (steady gradient measurements only, for clarity); (b) of  $[\text{C}_4\text{mpyr}]^+$  (blue symbols) and  $[\text{Tf}_2\text{N}]^-$  (red symbols) ions in  $[\text{C}_4\text{mpyr}][\text{Tf}_2\text{N}]$  and its mixtures with  $\text{AlCl}_3$  (steady gradient measurements only, for clarity); (c) of  $[\text{AlCl}_3]$  (black symbols, pulsed gradient) and  $[\text{Tf}_2\text{N}]^-$  (red symbols) ions in  $[\text{C}_4\text{mpyr}][\text{Tf}_2\text{N}]$  and its mixtures with  $\text{AlCl}_3$ . Symbols: circles,  $m_1 = 0$  mol/kg; squares,  $m_1 = 0.2$  mol/kg; triangles,  $m_1 = 0.5$  mol/kg; inverted triangles,  $m_1 = 0.7$  mol/kg; diamonds,  $m_1 = 1.0$  mol/kg. Note the crossover from the behavior  $D_{S+} > D_{S-}$  at low concentrations to  $D_{S+} < D_{S-}$  at higher concentrations for  $\{\text{AlCl}_3 + [\text{C}_2\text{TMEDA}][\text{Tf}_2\text{N}]\}$  mixtures, whereas  $D_{S+} > D_{S-}$  at all compositions in  $\{\text{AlCl}_3 + [\text{C}_4\text{mpyr}][\text{Tf}_2\text{N}]\}$ .

## References

1. T. Rüther, K. R. Harris, M. D. Horne, M. Kanakubo, T. Rodopoulos, J.-P. Veder and L. A. Woolf, L. A. *Chem. Eur. J.*, 2013, **19**, 17733-17744.
2. K. R. Harris, L. A. Woolf, L. A.; M. Kanakubo and T. Rüther, *T. J. Chem. Eng. Data*, 2011, **56**, 4672-4685.
3. R. Takagi and K. Kawamura, *Bull. Tokyo Inst. Technol.* 1975, **127**, 57-62.
4. K.R. Harris and M. Kanakubo, *J. Phys. Chem. B*, 2016, **120**, 12937-12949.
